# Supplementary material for: The Staphylococcus aureus Membrane Protein SA2056 Interacts with Peptidoglycan Synthesis Enzymes
Source: MDPI journal article supplement (doi:10.3390/antibiotics2010011), 2013-01-22
Supplement: s1 [file s1]

## Supplementary Material

**Supplementary Figure S1.** Construction of the *sa2056* mutant [1]. *sa2056* was excised by a three-step procedure developed by Bae *et al.* [2]: First, the temperature-sensitive plasmid pCQ30 was integrated at 43 °C either up- or down-stream of *sa2056* by homologous recombination. Only the resulting chromosomal organization of the recombination symbolized on the left is given. Next, the plasmid was allowed to excise together with the *sa2056* gene at permissive temperature (30 °C). Finally, bacteria were selected for plasmid loss.

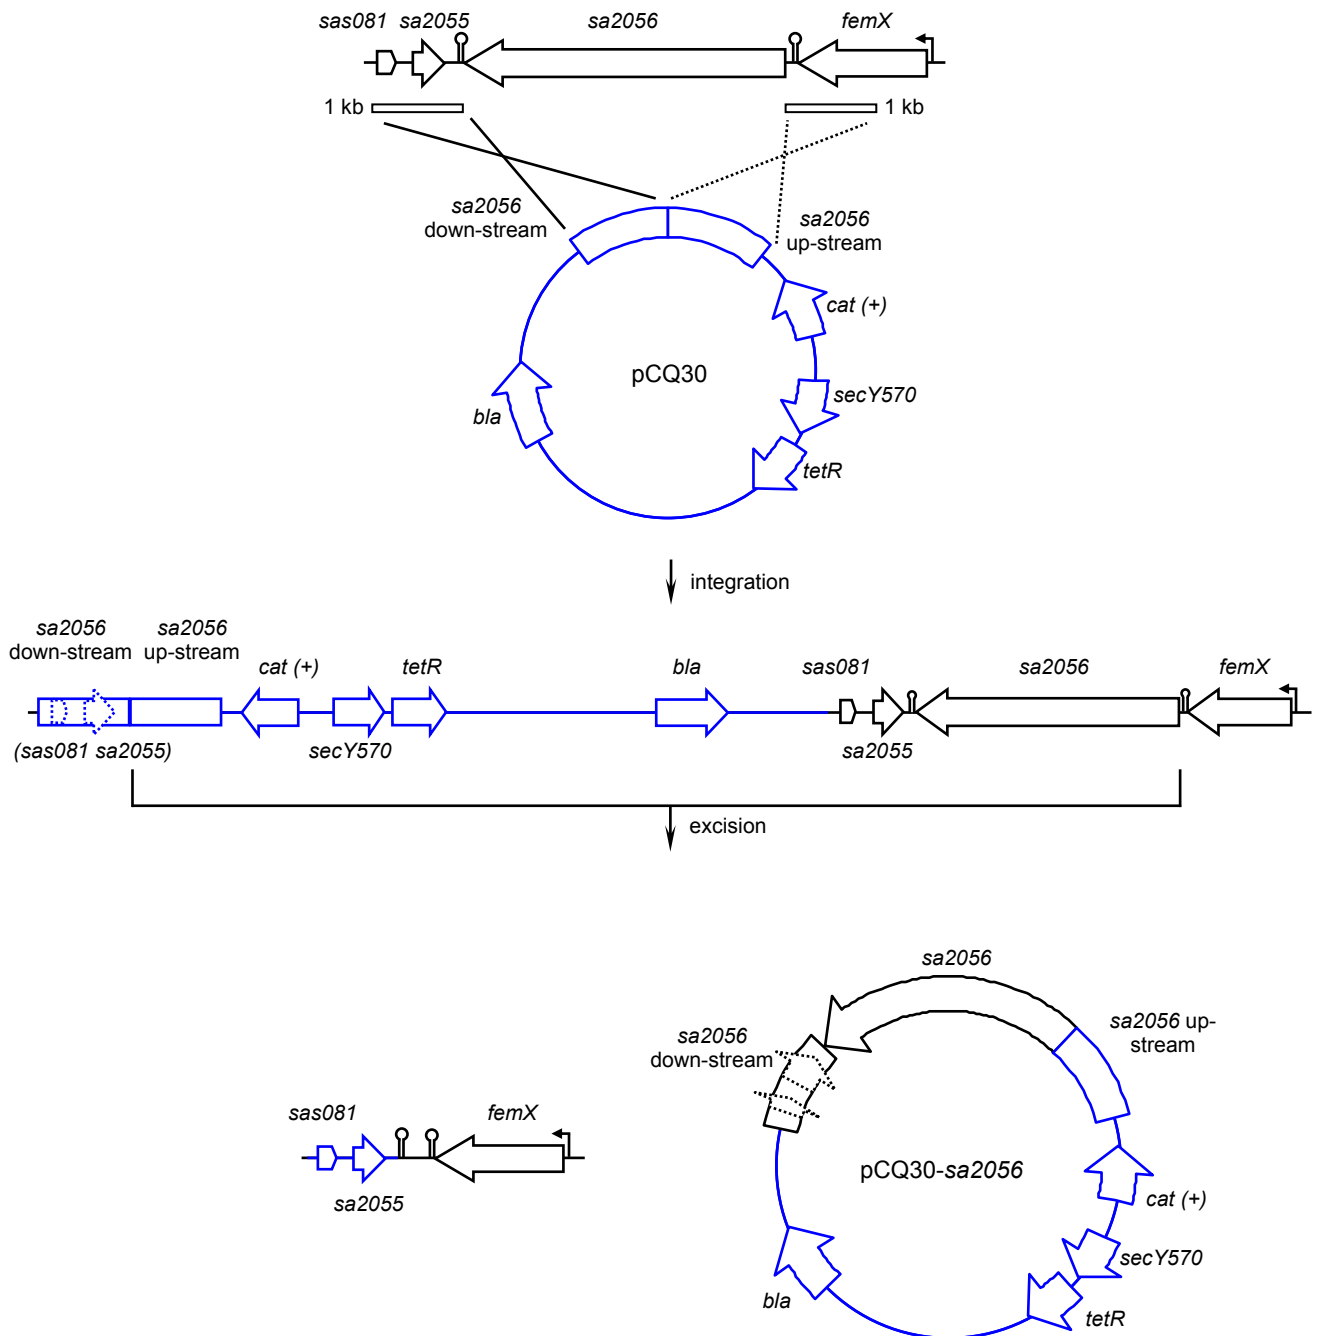

**Supplementary Figure S2. (a)** Amino acid sequence of SA2056. Transmembrane (TM) regions predicted by THMMH and C-termini of fragments (F) fused to PhoA are indicated. For TM2 and TM3, predictions of additional programs are depicted. Extra amino acids added to F3 are indicated (F3a–e). **(b)** Activity of fusion proteins was measured in biological and technical triplicates; mean values for each clone are given and the standard deviation is indicated. SA2056 fragments directing PhoA to the exoplasm were expected to produce values at least five times higher than the background levels (dashed line) measured in the *phoA*-negative *E. coli* strain CC118 (control).

**(a)**

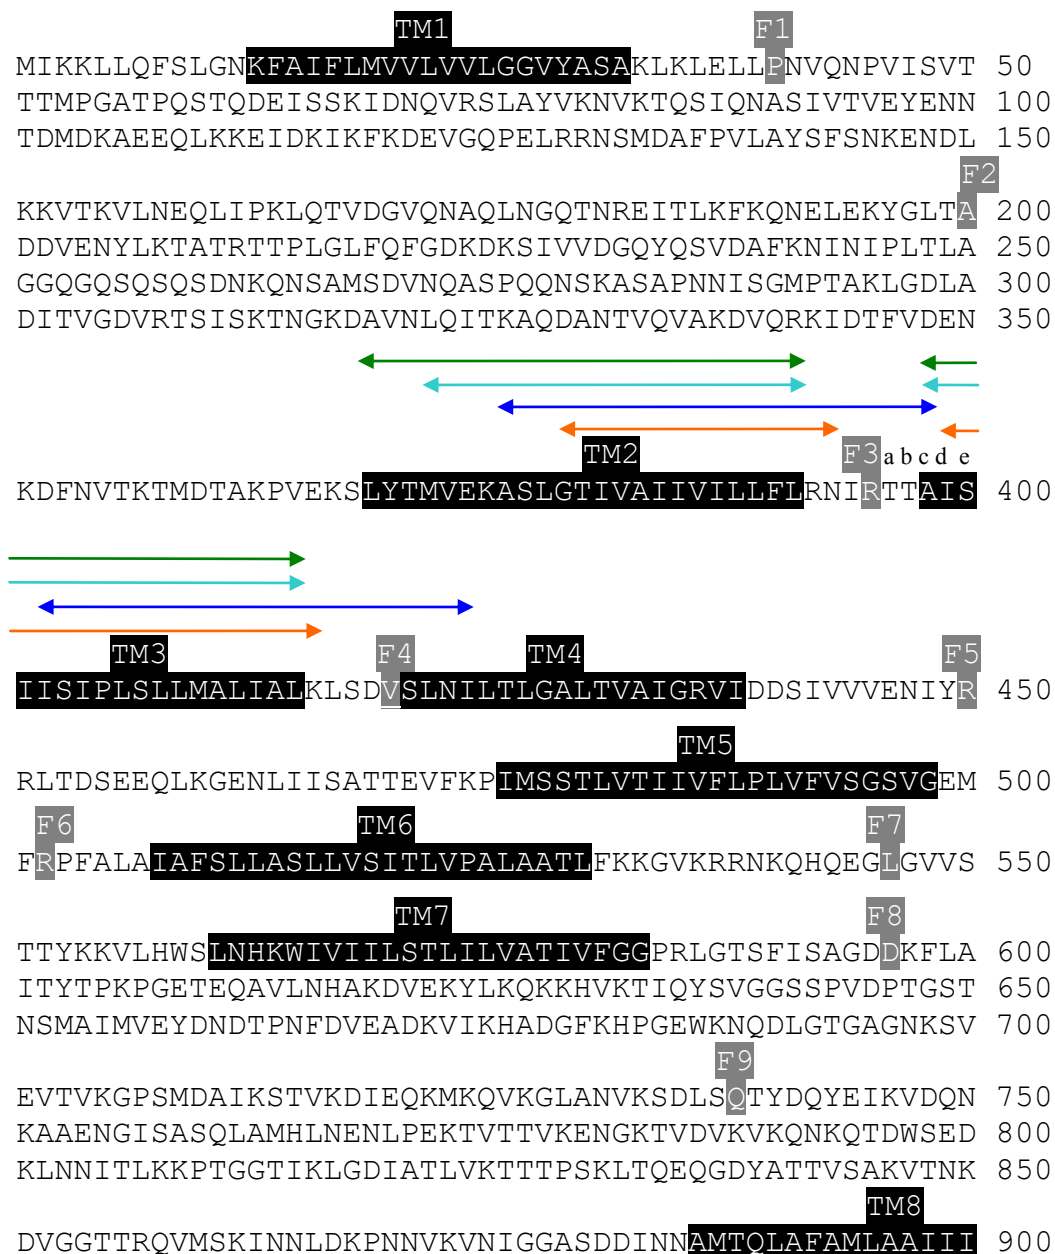

F10 TM9 F11  
 VYLILVITFKGGLAPFTILFSLPFTVIGVIALITGETISVPSLIGMLM 950  
 TM10 F12 TM11  
 LIGIVVTNAIVLIDRVINNEQQGMEMKEALIEAGGTRIRPILMTAIATIG 1000  
 F13 TM12  
 ALVPLLEFGQDSSILISKGLAATVIGGLISSTLLTLVVVPVIYEILFTLKK 1050  
 F14  
 RFTKR

|     | TMHMM   | DAS     | SOSUI   | HMMTOP  | MEMSAT  |
|-----|---------|---------|---------|---------|---------|
| TM2 | 369-391 | 379-392 | 376-398 | 372-391 | 375-391 |
| TM3 | 398-415 | 399-416 | 402-424 | 398-415 | 398-415 |

(b)

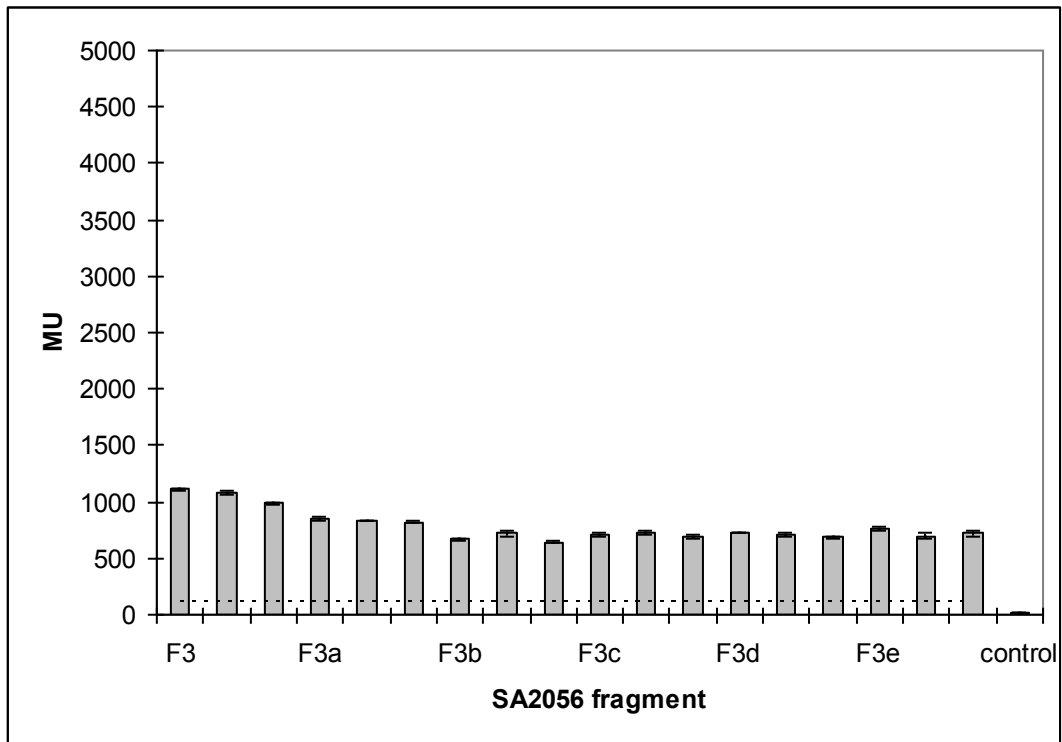

**Supplementary Figure S3.** Localisation of SA2056. Exponentially grown *S. aureus* expressing SA2056-GFP under the control of the *sa2056* promoter was visualised by (a) phase contrast or (b) fluorescence microscopy as described below. Arrows indicate examples of dividing bacteria with visible septa and SA2056-patches. Bars indicate the size of 1  $\mu\text{m}$ .

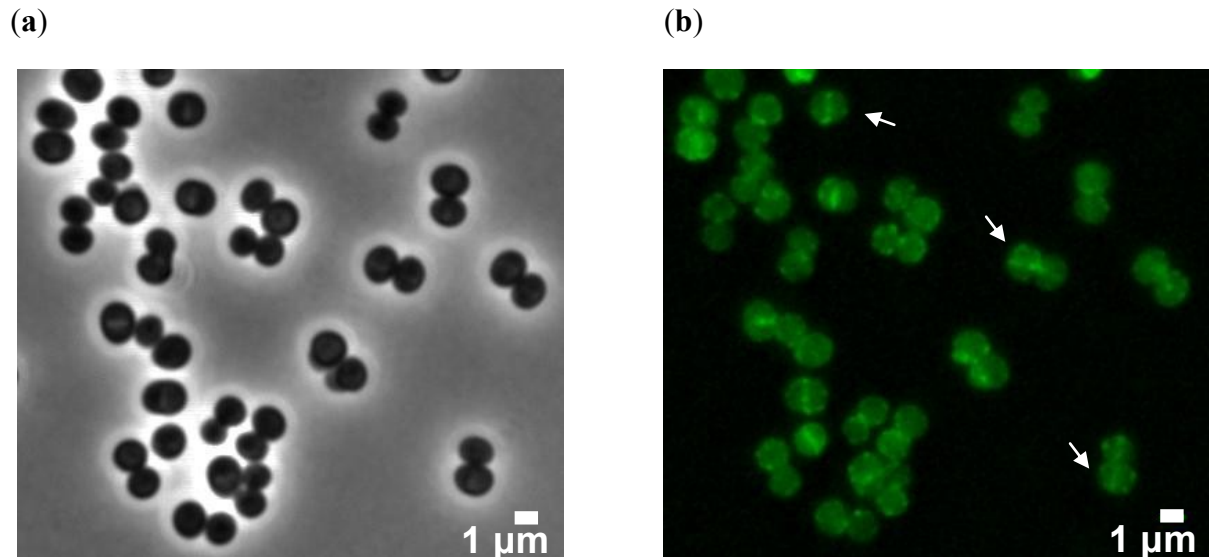

The 3'-region of SA2056 (SA2056<sub>666nt</sub>) was amplified from genomic DNA using primers listed in supplementary table T2. The SA2056<sub>666nt</sub> fragment was cloned to the 5' end of *gfpmut1* in pSG5082 using the XhoI and HindIII restriction sites, yielding pCQ44 [3]. Following the transformation of pCQ44 into *E. coli* DH5 $\alpha$  (CQ44), the suicide vector was integrated into *S. aureus* RN4220 (CQ48). To confirm correct integration, a PCR with subsequent sequencing of the region was performed.

CQ48 was grown in tryptic soy broth (TSB, Difco) until exponential phase, washed once in PBS (8 g NaCl, 0.2 g KCl, 2.68 g Na<sub>2</sub>HPO<sub>4</sub>-7H<sub>2</sub>O, 0.24 g KH<sub>2</sub>PO<sub>4</sub>, pH 7.4) and resuspended therein. A drop of bacterial suspension was spotted on a microscope slide overlaid with a thin layer of 1 % agarose in PBS and covered with a cover slip. Cells were visualised using a Zeiss Axio Observer.Z1 microscope and the Metamorph v. 7.5 software (Molecular Devices). Pictures were acquired with the Photometrics CoolSNAP HQ2 camera (Roper Scientific), which was connected to the microscope. Pictures were analysed with the ImageJ software [4].

**Supplementary Table S1.** Resistance profiles of strains Newman and *sa2056*.

|                                | Substance               | MIC [ $\mu\text{g}/\text{mL}$ ] |               |
|--------------------------------|-------------------------|---------------------------------|---------------|
|                                |                         | Newman                          | <i>sa2056</i> |
| Cell wall synthesis inhibitors | Cefoxitin               | 6                               | 6             |
|                                | Oxacillin               | 0.38                            | 0.38          |
|                                | Teicoplanin             | 4                               | 6             |
|                                | Vancomycin              | 5                               | 6             |
|                                | Lysostaphin             | 0.125–0.25                      | 0.125–0.25    |
|                                | D-cylcoserine           | 8                               | 8             |
|                                | Fosfomycin              | 0.25                            | 0.25          |
|                                | Ramoplanin              | 1                               | 1             |
|                                | Nisin                   | 4                               | 4             |
|                                | Mersacidin              | 32                              | 32            |
|                                | Bacitracin              | 8                               | 8             |
| RND substrates                 | Acriflavine             | 8                               | 8             |
|                                | EtBr                    | 1–2                             | 1–2           |
|                                | SDS                     | 64                              | 64            |
| Others                         | Daptomycin              | 2                               | 2             |
|                                | Clindamycin             | 0.94                            | 0.94          |
|                                | Chloramphenicol         | 4                               | 3             |
|                                | Tetracycline            | 0.19                            | 0.25          |
|                                | Gentamicin              | 0.75                            | 1             |
|                                | Erythromycin            | 0.25                            | 0.25          |
|                                | Novobiocin              | 0.0313                          | 0.0313        |
| Fatty acids                    | Capric acid             | 512                             | 512           |
|                                | Linoleic acid           | 16                              | 16            |
|                                | Cis-6-hexadecenoic acid | 64                              | 64            |

**Supplementary Table S2. Strains and plasmids used in this study.**

| <b>Strains</b>           | <b>Relevant genotype and phenotype</b>                                                                                                                                                                                  | <b>Reference or source</b> |
|--------------------------|-------------------------------------------------------------------------------------------------------------------------------------------------------------------------------------------------------------------------|----------------------------|
| <b><i>S. aureus</i></b>  |                                                                                                                                                                                                                         |                            |
| Newman                   | Clinical isolate (ATCC 25904), <i>rsbU</i> <sup>+</sup>                                                                                                                                                                 | [5]                        |
| RN4220                   | NCTC 8325-4 r <sup>-</sup> m <sup>+</sup>                                                                                                                                                                               | [6]                        |
| CQ33                     | Newman $\Delta$ <i>sa2056</i>                                                                                                                                                                                           | [1]                        |
| CQ38                     | Newman $\Delta$ <i>sa2056</i> pME2, Tc <sup>r</sup> , Mc <sup>r</sup>                                                                                                                                                   | [1]                        |
| CQ39                     | Newman pME2, Tc <sup>r</sup> , Mc <sup>r</sup>                                                                                                                                                                          | [1]                        |
| CQ48                     | RN4220 <i>sa2056</i> ::pCQ44, SA2056-GFP, Em <sup>r</sup>                                                                                                                                                               | This study                 |
| MS146                    | Newman <i>femB</i> ::Tn551, Em <sup>r</sup> , Lss <sup>r</sup>                                                                                                                                                          | This study                 |
| MS147                    | Newman $\Delta$ <i>sa2056 femB</i> ::Tn551, Em <sup>r</sup> , Lss <sup>r</sup>                                                                                                                                          | This study                 |
| UT34-2                   | NCTC 8325 <i>mec</i> $\Omega$ 2006( <i>femB</i> ::Tn551), Em <sup>r</sup> , Lss <sup>r</sup>                                                                                                                            | [7]                        |
| <b><i>E. coli</i></b>    |                                                                                                                                                                                                                         |                            |
| BL21                     | Expression strain, DE3 ( <i>E. coli</i> B F <sup>-</sup> <i>ompT hsdS<sub>B</sub> gal dcm</i> ), $\lambda$ prophage carrying T7 polymerase                                                                              | Novagen                    |
| CE43                     | Membrane protein overproducer selected from BL21                                                                                                                                                                        | [8]                        |
| CC118                    | Reporter strain for PhoA fusion, $\Delta$ ( <i>ara-leu</i> )7697 $\Delta$ <i>lacX74</i> $\Delta$ <i>phoA20 galE galK</i>                                                                                                | [9]                        |
| CQ44                     | DH5 $\alpha$ pCQ44, Ap <sup>r</sup>                                                                                                                                                                                     | This study                 |
| DH5 $\alpha$             | Cloning strain (F <sup>-</sup> $\Phi$ 80 <i>lacZ</i> $\Delta$ M15 $\Delta$ ( <i>lacZYA-argF</i> )U169 <i>recA1 endA1 hsdR17</i> (rk <sup>-</sup> , mk <sup>+</sup> ) <i>phoA supE44 thi-1 gyrA96 relA1</i> $\lambda$ -] | Invitrogen                 |
| DHM1                     | BACTH reporter strain, <i>cya</i>                                                                                                                                                                                       | [10]                       |
| <b>Plasmids</b>          |                                                                                                                                                                                                                         |                            |
| pCQ44                    | Suicide vector, SA2056 <sub>666nt</sub> -GFP fusion at C-terminus, Ap <sup>r</sup> , Em <sup>r</sup>                                                                                                                    | This study                 |
| pET24b(+)                | Expression vector, N-terminal T7-Tag or C-terminal His <sub>6</sub> -Tag, T7 promoter, Km <sup>r</sup>                                                                                                                  | Novagen                    |
| pET24b(+)- <i>femA</i>   | Expression vector, <i>femA</i> with His <sub>6</sub> -Tag at the C-terminus, Km <sup>r</sup>                                                                                                                            | [11]                       |
| pET24b(+)- <i>femB</i>   | Expression vector, <i>femB</i> with His <sub>6</sub> -Tag at the C-terminus, Km <sup>r</sup>                                                                                                                            | [11]                       |
| pET24b(+)- <i>femX</i>   | Expression vector, <i>femX</i> with His <sub>6</sub> -Tag at the C-terminus, Km <sup>r</sup>                                                                                                                            | This study                 |
| pET24b(+)- <i>sa2056</i> | Expression vector, <i>sa2056</i> with His <sub>6</sub> -Tag at the C-terminus, Km <sup>r</sup>                                                                                                                          | This study                 |
| pGEX-2T                  | Expression vector, N-terminal GST-Tag, Ap <sup>r</sup>                                                                                                                                                                  | GE Healthcare              |
| pGEX-2T- <i>femA</i>     | Expression vector, <i>femA</i> with GST-Tag at the N-terminus, Ap <sup>r</sup>                                                                                                                                          | This study                 |
| pGEX-2T- <i>femB</i>     | Expression vector, <i>femB</i> with GST-Tag at the N-terminus, Ap <sup>r</sup>                                                                                                                                          | This study                 |
| pGEX-2T- <i>femX</i>     | Expression vector, <i>femX</i> with GST-Tag at the N-terminus, Ap <sup>r</sup>                                                                                                                                          | This study                 |
| pGEX-2T- <i>sa2056</i>   | Expression vector, <i>sa2056</i> with GST-Tag at the N-terminus, Ap <sup>r</sup>                                                                                                                                        | This study                 |
| pHA-1( <i>yedZ</i> )     | PhoA fusion expression plasmid containing <i>yedZ</i> (XhoI-KpnI) with <i>phoA</i> fused to the 3'-end, <i>araB</i> promoter                                                                                            | [12]                       |
| pHA-F1-F14               | PhoA fusion vectors, <i>sa2056</i> fragments encoding F1-F14 fused to the 5'-end of <i>phoA</i>                                                                                                                         | This study                 |
| pKT25                    | BACTH vector, MCS at the C-terminus of the CyaA domain T25, Km <sup>r</sup>                                                                                                                                             | [10]                       |
| pKNT                     | BACTH vector, MCS at the N-terminus of the CyaA domain T25, Km <sup>r</sup>                                                                                                                                             | [13]                       |
| pKT25- <i>femA</i>       | BACTH vector, <i>femA</i> fused to the C-terminus of T25, Km <sup>r</sup>                                                                                                                                               | [11]                       |
| pKT25- <i>femB</i>       | BACTH vector, <i>femB</i> fused to the C-terminus of T25, Km <sup>r</sup>                                                                                                                                               | [11]                       |

**Table S2. Cont.**

| <b>Strains</b>        | <b>Relevant genotype and phenotype</b>                                       | <b>Reference or source</b> |
|-----------------------|------------------------------------------------------------------------------|----------------------------|
| pKT25- <i>femX</i>    | BACTH vector, <i>femX</i> fused to the C-terminus of T25, Km <sup>r</sup>    | This study                 |
| pKT25- <i>pbp1</i>    | BACTH vector, <i>pbp1</i> fused to the C-terminus of T25, Km <sup>r</sup>    | [14]                       |
| pKT25- <i>pbp2</i>    | BACTH vector, <i>pbp2</i> fused to the C-terminus of T25, Km <sup>r</sup>    | [14]                       |
| pKT25- <i>pbp3</i>    | BACTH vector, <i>pbp3</i> fused to the C-terminus of T25, Km <sup>r</sup>    | This study                 |
| pKNT25- <i>pbp4</i>   | BACTH vector, <i>pbp4</i> fused to the N-terminus of T25, Km <sup>r</sup>    | [14]                       |
| pKT25- <i>pbp2a</i>   | BACTH vector, <i>pbp2a</i> fused to the C-terminus of T25, Km <sup>r</sup>   | This study                 |
| pKT25- <i>sa2056</i>  | BACTH vector, <i>sa2056</i> fused to the C-terminus of T25, Km <sup>r</sup>  | This study                 |
| pSG5082               | Suicide vector, for c-terminal GFP fusion, Ap <sup>r</sup> , Em <sup>r</sup> | [3]                        |
| pUT18                 | BACTH vector, MCS at the N-terminus of the CyaA domain T18, Ap <sup>r</sup>  | [10]                       |
| pUT18C                | BACTH vector, MCS at the C-terminus of the CyaA domain T18, Ap <sup>r</sup>  | [10]                       |
| pUT18C- <i>femA</i>   | BACTH vector, <i>femA</i> fused to the C-terminus of T18, Ap <sup>r</sup>    | [11]                       |
| pUT18C- <i>femB</i>   | BACTH vector, <i>femB</i> fused to the C-terminus of T18, Ap <sup>r</sup>    | This study                 |
| pUT18C- <i>femX</i>   | BACTH vector, <i>femX</i> fused to the C-terminus of T18, Ap <sup>r</sup>    | This study                 |
| pUT18C- <i>pbp1</i>   | BACTH vector, <i>pbp1</i> fused to the C-terminus of T18, Ap <sup>r</sup>    | [14]                       |
| pUT18C- <i>pbp2</i>   | BACTH vector, <i>pbp2</i> fused to the C-terminus of T18, Ap <sup>r</sup>    | This study                 |
| pUT18C- <i>pbp3</i>   | BACTH vector, <i>pbp3</i> fused to the C-terminus of T18, Ap <sup>r</sup>    | [14]                       |
| pUT18- <i>pbp4</i>    | BACTH vector, <i>pbp4</i> fused to the N-terminus of T18, Ap <sup>r</sup>    | [14]                       |
| pUT18C- <i>pbp2a</i>  | BACTH vector, <i>pbp2a</i> fused to the C-terminus of T18, Ap <sup>r</sup>   | This study                 |
| pUT18C- <i>sa2056</i> | BACTH vector, <i>sa2056</i> fused to the C-terminus of T18, Ap <sup>r</sup>  | This study                 |

MCS, multiple cloning site; Ap<sup>r</sup>, ampicillin resistant; Cm<sup>r</sup>, chloramphenicol resistant; Em<sup>r</sup>, erythromycin resistant; Lss<sup>r</sup>, lysostaphin resistant; Mc<sup>r</sup>, methicillin resistant; Tc<sup>r</sup>, tetracycline resistant.

**Supplementary Table S3.** Primers used in this study.

| Primer | Sequence 5'-3'                             | Use                                                           | Reference  |
|--------|--------------------------------------------|---------------------------------------------------------------|------------|
| CQ10   | TCACCCTCTCCACTGACAGA                       | Confirmation pCQ44 integration                                | This study |
| CQ31   | AGTGTGGGGAACATACTTAAGTG                    | Confirmation pCQ44 integration                                | [3]        |
| CQ33   | ATCGAAGCAGGCGGTA                           | Sequencing CQ48                                               | This study |
| CQ72   | TATAAGCTTTCGTTTAGTGAATCGTTT                | Construction of pCQ44                                         | This study |
| CQ73   | AAACTCGAGCAAGAACAAGGAGATTATGC              | Construction of pCQ44                                         | This study |
| CQ74   | CATCACTTGTCTGTGTTGTGC                      | Sequencing CQ48                                               | This study |
| EH4    | CTGGTACCTTAGTTGAATATACCTGTAAATCCAC         | Construction of pUT18C- <i>pbp2</i>                           | This study |
| EH34   | CCGCTCGAGATGATAAAAAAGCTATTAC               | Construction of pHA1-F1-14                                    | This study |
| EH35   | CCGGGTACCGGTAGTAATTCTAATTTCA               | Construction of pHA1-F1                                       | This study |
| EH36   | ATAGGTACCGCAGTCAACCCATATTTTTTC             | Construction of pHA1-F2                                       | This study |
| EH37   | ACGGGTACCCGAATGTTTCTTAAAAACAG              | Construction of pHA1-F3                                       | This study |
| EH38   | GATGGTACCACATCACTCAATTTTCAGAG              | Construction of pHA1-F4                                       | This study |
| EH39   | CCGGGTACCCGATAAATATTTTTCAACAA              | Construction of pHA1-F5                                       | This study |
| EH40   | TATGGTACCCTAAACATTTTCGCCTACTG              | Construction of pHA1-F6                                       | This study |
| EH41   | ATCGGTACCAATCCTTCTTGATGTTGT                | Construction of pHA1-F7                                       | This study |
| EH42   | ATTGGTACCTTATCGTCACCTGCTG                  | Construction of pHA1-F8                                       | This study |
| EH43   | TATGGTACCTGCGATAAATCAGATTTGAC              | Construction of pHA1-F9                                       | This study |
| EH44   | GCGGGTACCCACCTTTAAATGTAATA                 | Construction of pHA1-F10                                      | This study |
| EH45   | TAGGGTACCGTTTCTCCTGTGATTAATAG              | Construction of pHA1-F11                                      | This study |
| EH46   | TATGGTACCTTCATCTCCATGCCC                   | Construction of pHA1-F12                                      | This study |
| EH47   | GTGGGTACCGAAATAAGAATCGAGCTAT               | Construction of pHA1-F13                                      | This study |
| EH48   | CATGGTACCCGTTTAGTGAATCGTT                  | Construction of pHA1-F14                                      | This study |
| EH50   | AACTGCAGGACGGAAAACAAAGGATCTTC              | Construction of pUT18C- <i>pbp2</i>                           | This study |
| MS79   | ATGGGATCCTGCGAAGCAAAAATTAATAATTA           | Construction of pET24b- <i>pbp1</i>                           | This study |
| MS80   | TTACTCGAGTCCGACTTATCCTTG                   | Construction of pET24b- <i>pbp1</i>                           | This study |
| MS81   | TTGGGATCCCTTAAAAAGACTAAAAGAAAAATCA<br>AATG | Construction of pET24b- <i>pbp3</i>                           | This study |
| MS82   | TTACTCGAGTTTGTCTTTGTCTTTATTTTTATC          | Construction of pET24b- <i>pbp3</i>                           | This study |
| MS83   | ATGGGATCCCAAAAATTAATATCTATTATCATCA<br>TTT  | Construction of pET24b- <i>pbp4</i>                           | This study |
| MS84   | TTACTCGAGTTTCTTTTTCTAAATAAACGATTG          | Construction of pET24b- <i>pbp4</i>                           | This study |
| MS85   | ATGGGATCCCAAAAAGATAAAAATTGTTCCACT          | Construction of pET24b- <i>mecA</i>                           | This study |
| MS86   | TTACTCGAGTTCATCTATATCGTATTTTTTATT          | Construction of pET24b- <i>mecA</i>                           | This study |
| MS106  | CTAGAATTCCTTTTCGTTTAAATTTACGAGATATTT       | Construction of pGEX-2T- <i>sa2056</i>                        | This study |
| MS107  | CGTGGATCCATAAAAAAGCTATTACAATTTTC           | Construction of pGEX-2T- <i>sa2056</i>                        | This study |
| MS108  | CTAGAATTCCTATCGTTTAGTGAATCGT               | Construction of pGEX-2T- <i>sa2056</i>                        | This study |
| MS109  | GTAAGATCTGAAAAGATGCATATCACTAATC            | Construction of pGEX-2T- <i>femX</i>                          | This study |
| MS116  | GCAGGTACCCTATTTCTTTAATTTTTTACG             | Construction of pKT25- <i>femB</i> and<br>pUT18C- <i>femB</i> | This study |
| MS117  | GTTGAATTCCTATTTCTTTAATTTTTTACG             | Construction of pGEX-2T- <i>femB</i>                          | This study |
| MS118  | CTAGAATTCCTATTTTCGTTTAAATTTACGAG           | Construction of pGEX-2T- <i>femX</i>                          | This study |
| MS155  | ATTGGTACCGTACGAATGTTTCTTAAAAACAG           | Construction of pHA1-F3a                                      | This study |
| MS156  | GAAGGTACCGTCTGACGAATGTTTCTTAAAAAC          | Construction of pHA1-F3b                                      | This study |
| MS157  | ATAGGTACCGCCGTCGTACGAATGTTTC               | Construction of pHA1-F3c                                      | This study |
| MS158  | GATGGTACCCCAATTGCCGTCGTACGAATGTTTC         | Construction of pHA1-F3d                                      | This study |



**Table S3. Cont.**

| Primer | Sequence 5'-3'                               | Use                                   | Reference  |
|--------|----------------------------------------------|---------------------------------------|------------|
| MS159  | GAT <u>GGTACC</u> GAAATTGCCGTCGTACGAATG      | Construction of pHA1-F3e              | This study |
| SR2    | CGAG <u>CTAGC</u> GAAAAGATGCATATCACTAATC     | Construction of pET24b- <i>femX</i>   | [15]       |
| SR3    | GCA <u>CTCGAG</u> TTTTTCGTTTTTAATTTACG       | Construction of pET24b- <i>femX</i>   | [15]       |
| SR71   | CGT <u>CTCGAG</u> TCGTTTAGTGAATCGTTTTTT      | Construction of pET24b- <i>sa2056</i> | This study |
| SR73   | GCAG <u>CTAGC</u> CATAAAAAAGCTATTACAATTTCTTT | Construction of pET24b- <i>sa2056</i> | This study |
| SR100  | GCA <u>CTGCAG</u> GAAATTTACAGAGTAACTG        | Construction of pUT18C- <i>femB</i>   | [11]       |
| SR101  | GCA <u>CTGCAG</u> TGAAATTTACAGAGTAACTG       | Construction of pKT25- <i>femB</i>    | [11]       |
| SR103  | CTA <u>CTGCAG</u> GGAAAAGATGCATATCAC         | Construction of pKT25- <i>femX</i>    | [11]       |
| SR104  | CAT <u>CTGCAG</u> TGAAAAGATGCATATCAC         | Construction of pUT18C- <i>femX</i>   | [11]       |
| SR105  | GCAG <u>GTACC</u> TATTTTCGTTTTAATTTACG       | Construction of pKT25- <i>femX</i>    | [11]       |
| SR106  | GTT <u>GGATCC</u> AAGTTTACAAATTTAACAGCTA     | Construction of pGEX-2T- <i>femA</i>  | [11]       |
| SR107  | GTT <u>GAATTC</u> CTAAAAAATTCTGTCTTTAACTTT   | Construction of pGEX-2T- <i>femA</i>  | [11]       |
| SR108  | CAAG <u>GATCC</u> AAATTTACAGAGTAACTGTTAC     | Construction of pGEX-2T- <i>femB</i>  | [11]       |

Restriction sites are underlined.

## References and Notes

1. Quiblier, C.; Zinkernagel, A.; Schuepbach, R.; Berger-Bächi, B.; Senn, M. Contribution of SecDF to *Staphylococcus aureus* resistance and expression of virulence factors. *BMC Microbiol.* **2011**, *11*, doi:10.1186/1471-2180-11-72.
2. Bae, T.; Schneewind, O. Allelic replacement in *Staphylococcus aureus* with inducible counter-selection. *Plasmid* **2006**, *55*, 58–63.
3. Pinho, M.G.; Errington, J. A *divIVA* null mutant of *Staphylococcus aureus* undergoes normal cell division. *FEMS Microbiol. Lett.* **2004**, *240*, 145–149.
4. ImageJ. Available online: <http://rsb.info.nih.gov/ij/index.html> (accessed on 24 December 2012).
5. Duthie, E.S.; Lorenz, L.L. Staphylococcal coagulase; mode of action and antigenicity. *J. Gen. Microbiol.* **1952**, *6*, 95–107.
6. Kreiswirth, B.N.; Lofdahl, S.; Betley, M.J.; O'Reilly, M.; Schlievert, P.M.; Bergdoll, M.S.; Novick, R.P. The toxic shock syndrome exotoxin structural gene is not detectably transmitted by a prophage. *Nature* **1983**, *305*, 709–712.
7. Henze, U.; Sidow, T.; Wecke, J.; Labischinski, H.; Berger-Bächi, B. Influence of *femB* on methicillin resistance and peptidoglycan metabolism in *Staphylococcus aureus*. *J. Bacteriol.* **1993**, *175*, 1612–1620.
8. Miroux, B.; Walker, J.E. Over-production of proteins in *Escherichia coli*: Mutant hosts that allow synthesis of some membrane proteins and globular proteins at high levels. *J. Mol. Biol.* **1996**, *260*, 289–298.
9. Lee, E.; Manoil, C. Mutations eliminating the protein export function of a membrane- spanning sequence. *J. Biol. Chem.* **1994**, *269*, 28822–28828.
10. Karimova, G.; Pidoux, J.; Ullmann, A.; Ladant, D. A bacterial two-hybrid system based on a reconstituted signal transduction pathway. *Proc. Natl. Acad. Sci. USA* **1998**, *95*, 5752–5756.
11. Rohrer, S.; Berger-Bächi, B. Application of a bacterial two-hybrid system for the analysis of protein-protein interactions between FemABX family proteins. *Microbiology* **2003**, *149*, 2733–2738.

12. Drew, D.; Sjöstrand, D.; Nilsson, J.; Urbig, T.; Chin, C.N.; de Gier, J.W.; von Heijne, G. Rapid topology mapping of *Escherichia coli* inner-membrane proteins by prediction and PhoA/GFP fusion analysis. *Proc. Natl. Acad. Sci. USA* **2002**, *99*, 2690–2695.
13. Karimova, G.; Dautin, N.; Ladant, D. Interaction network among *Escherichia coli* membrane proteins involved in cell division as revealed by bacterial two-hybrid analysis. *J. Bacteriol.* **2005**, *187*, 2233–2243.
14. Reed, P.; Veiga, H.; Jorge, A.M.; Terrak, M.; Pinho, M.G. Monofunctional transglycosylases are not essential for *Staphylococcus aureus* cell wall synthesis. *J. Bacteriol.* **2011**, *193*, 2549–2556.
15. Rohrer, S. Studies on members of the FemABX protein family in *Staphylococcus aureus*. Ph.D. Thesis, Swiss Federal Institute of Technology, Zürich, Switzerland, 2002; p. 152.

© 2013 by the authors; licensee MDPI, Basel, Switzerland. This article is an open access article distributed under the terms and conditions of the Creative Commons Attribution license (<http://creativecommons.org/licenses/by/3.0/>).
